# Supplementary material
Source: publisher figshare collection journal article supplement (https://frontiersin.figshare.com/ndownloader/files/11973146)

*Supplementary Material*

**Kynurenine 3-Monooxygenase Gene Associated with Nicotine Initiation and Addiction: Analysis of Novel Regulatory Features at 5' and 3'-Regions**

**Hassan A. Aziz<sup>1</sup>, Abdel-Salam Gomaa Abdel-Salam<sup>1\*</sup>, Mohammed A. Ibrahim Al-Obaide<sup>2</sup>, Hytham W. Alobydi<sup>3</sup>, Saif Al-Humaish<sup>3</sup>**

**\* Correspondence:** Corresponding Author: [Abdo@qu.edu.qa](mailto:Abdo@qu.edu.qa)

**Figure S3.** Alignment analysis by EMBOSS Matcher tool to show the similarity between the uncharacterized LOC105373233 ncRNA XR\_949327.1 and *KMO* mRNA M\_003679.4. We identified a sequence in the XR\_949327.1 composed of 52 bps showed 75% similarity with the matching *KMO* NM\_003679.4.

```
# Program: matcher
# Rundate: Wed 25 Apr 2018 21:26:49
sequence. # Commandline: matcher

# Aligned_sequences: 2
# 1: NM_003679.4
# 2: XR_949327.1
# Matrix: EDNAFULL
# Gap_penalty: 16
# Extend_penalty: 4
#
# Length: 52
# Identity:      39/52 (75.0%)
# Similarity:    39/52 (75.0%)
# Gaps:          1/52 ( 1.9%)
# Score: 131
#
#=====

NM_003679.4      2419 CTATTTATTTA-TGTATTTAGAGATCAGGTCTCACTCTGTTGACCAGGCT      2467
                ||||..|.||| |.||..|||||...|||.||||..|||||||
XR_949327.1      368  CTATGAACCTACTTTACGTAGAGACGGGTTTCACCATGTTGACCAGGCT      417

NM_003679.4      2468 GG      2469
                ||
XR_949327.1      418 GG      419
```

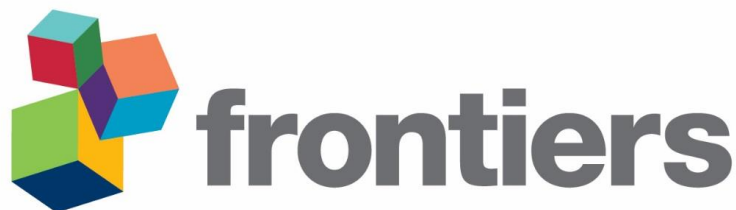

Supplement: Supplementary file [file 11973146]
